# Supplementary material
Source: PubMed Central journal article supplement (PMC3458465)

## **Supplemental appendix:**

### **Supplemental Methods**

Western blot of discordant samples

rPLA2R (300ng/track) was run on a 10% SDS PAGE gel under non reducing conditions. The gel was electroblotted onto immobilon membrane using semi dry conditions for 60 mins and blocked for 60 mins in Superblock solution. Each track was cut out and placed in a multiwell cassette for incubation with test serum at 1:10 dilution in Superblock containing 0.1% Tween 20. A positive serum (concordantly positive by both IFa and ELISA) and a negative serum (concordantly negative by both assays) and the 7 sera yielding discordant results by IFa and ELISA were tested. Following incubation for 2 hours with test sera, membrane strips were washed 3 times in PBS Tween, incubated with 1:25,000 dilution of biotin conjugated anti-IgG (Jackson Labs) for 2 hours, washed 3 times in PBS Tween, incubated with 1:1000 dilution of QDOT 625 Streptavidin for 2 hours and washed 3 times in PBS Tween. Strips were aligned on a glass plate and examined for fluorescence using an Alpha Imager (excitation 365nm, emission 625nm).

## Supplemental Table S1

**Table S1a.** Outcome in different tertiles of IgG4 titer (ELISA)

| <b>Outcome:</b>      | <b>aPLA2R_IgG4<br/>0-63<br/>(n=26)</b> | <b>aPLA2R_IgG4<br/>64-133<br/>(n= 25)</b> | <b>aPLA2R_IgG4<br/>&gt;133<br/>(n=26)</b> | <b>p-<br/>value</b> |
|----------------------|----------------------------------------|-------------------------------------------|-------------------------------------------|---------------------|
| Partial remission    | 10 (39%)                               | 9 (36%)                                   | 10 (39%)                                  | ns                  |
| Complete remission   | 5 (19%)                                | 11 (44%)                                  | 8 (31%)                                   | ns                  |
| Renal failure        | 5 (19%)                                | 0                                         | 4 (15%)                                   | ns                  |
| Persist. proteinuria | 6 (23%)                                | 5 (20%)                                   | 4 (15%)                                   | ns                  |
| Spont. remission     | 6 (23%)                                | 10 (40%)                                  | 2 (8%)                                    | 0.03                |

**Table S1b.** Outcome in different tertiles of IgG3 titer (ELISA)

| <b>Outcome:</b>      | <b>aPLA2R_IgG3<br/>0-4<br/>(n=29)</b> | <b>aPLA2R_IgG3<br/>5-13<br/>(n= 24)</b> | <b>aPLA2R_IgG3<br/>&gt;13<br/>(n=24)</b> | <b>p-<br/>value</b> |
|----------------------|---------------------------------------|-----------------------------------------|------------------------------------------|---------------------|
| Partial remission    | 6 (18%)                               | 11 (46%)                                | 12 (50%)                                 | ns                  |
| Complete remission   | 12 (39%)                              | 6 (25%)                                 | 6 (25%)                                  | ns                  |
| Renal failure        | 3 (14%)                               | 2 (8%)                                  | 4 (17%)                                  | ns                  |
| Persist. proteinuria | 8 (27%)                               | 5 (21%)                                 | 2 (8%)                                   | ns                  |
| Spont. remission     | 9 (31%)                               | 4 (17%)                                 | 5 (21%)                                  | ns                  |

**Table S1c.** Outcome in different tertiles of IgG1 titer (ELISA)

| <b>Outcome:</b>      | <b>aPLA2R_IgG1<br/>0-9<br/>(n=25)</b> | <b>aPLA2R_IgG1<br/>10-26<br/>(n= 27)</b> | <b>aPLA2R_IgG1<br/>&gt;26<br/>(n=25)</b> | <b>p-<br/>value</b> |
|----------------------|---------------------------------------|------------------------------------------|------------------------------------------|---------------------|
| Partial remission    | 8 (32%)                               | 10 (37%)                                 | 11 (44%)                                 | ns                  |
| Complete remission   | 7 (28%)                               | 10 (37%)                                 | 7 (28%)                                  | ns                  |
| Renal failure        | 2 (8%)                                | 3 (11%)                                  | 4 (16%)                                  | ns                  |
| Persist. proteinuria | 8 (32%)                               | 4 (15%)                                  | 3 (12%)                                  | ns                  |
| Spont. remission     | 10 (40%)                              | 5 (19%)                                  | 3 (12%)                                  | ns                  |

aPLA2R\*Fract.IgG= anti-PLA2R antibody titer \* fractional IgG excretion; Partial remission = proteinuria <3.5 g/day with  $\Delta$ proteinuria >-50% from baseline and stable renal function; complete remission = proteinuria <0.2 g/day with stable renal function; renal failure =  $\Delta$  serum creatinine >+50% from baseline; persist.proteinuria = persistent proteinuria >3.5 g/day or >50% of baseline proteinuria without  $\Delta$  serum creatinine >+50%; Spont.remission = spontaneous remission (no treatment with immunosuppressive agents)

Supplemental Figures

Figure S1: Correlation between anti-PLA<sub>2</sub>R titers measured with an indirect immunofluorescence technique and proteinuria in the patients of the Dutch cohort.

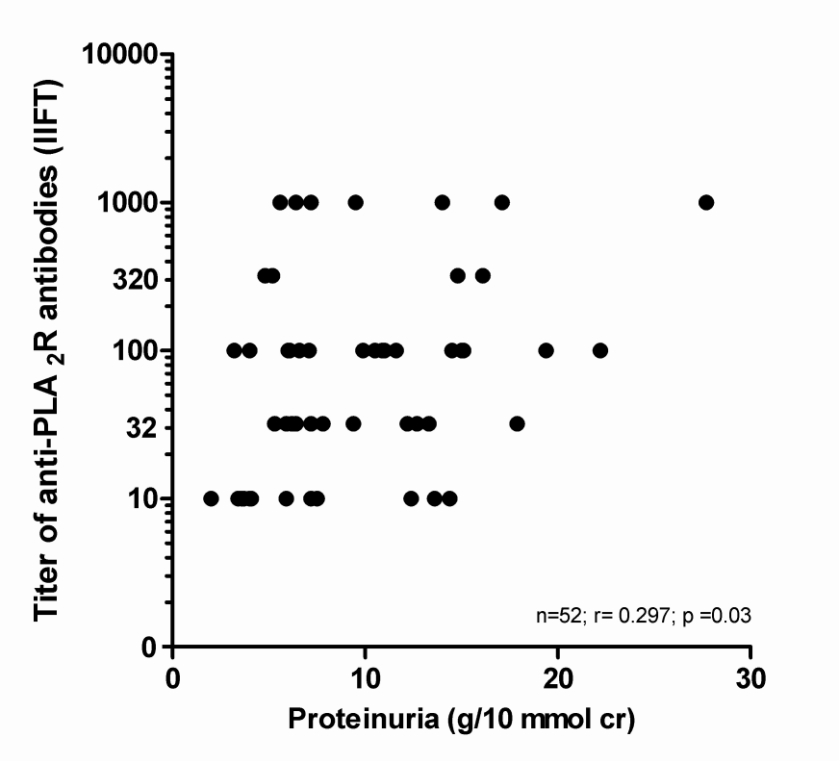

S1a: unadjusted analysis

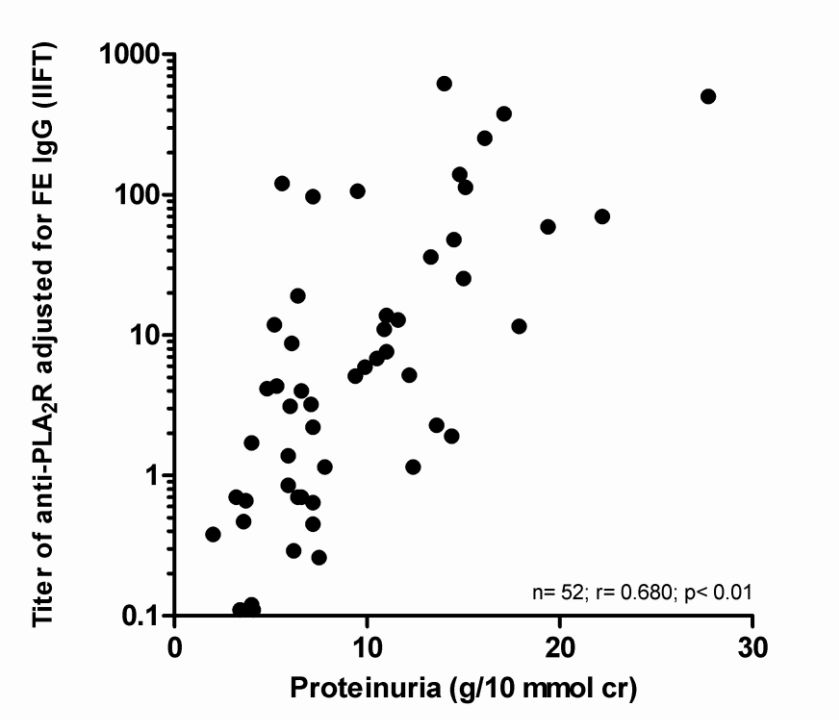

S1b: anti-PLA<sub>2</sub>R levels adjusted for fractional excretion of IgG

**Figure S2:** Western blot in 7 discordant patients  
 WB =Western blot  
 IFa = aPLA2R antibody titer by indirect immunofluorescence test  
 ELISA = aPLA2R antibody titer by ELISA

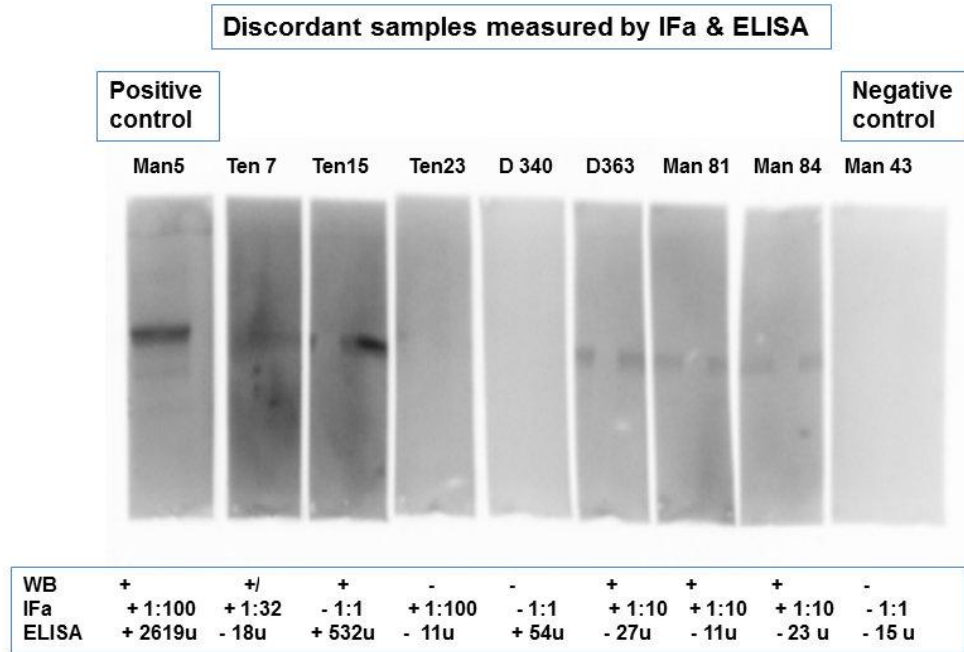

Supplement: ASN.2012030242_ASN2012030242SupplementaryData.pdf [file ASN.2012030242_ASN2012030242SupplementaryData.pdf]
